# Supplementary material
Source: Springer Nature journal article supplement (https://www.springermedizin.de/resource/supplementary/12911_2012_584_MOESM17_ESM.pdf/9525850)

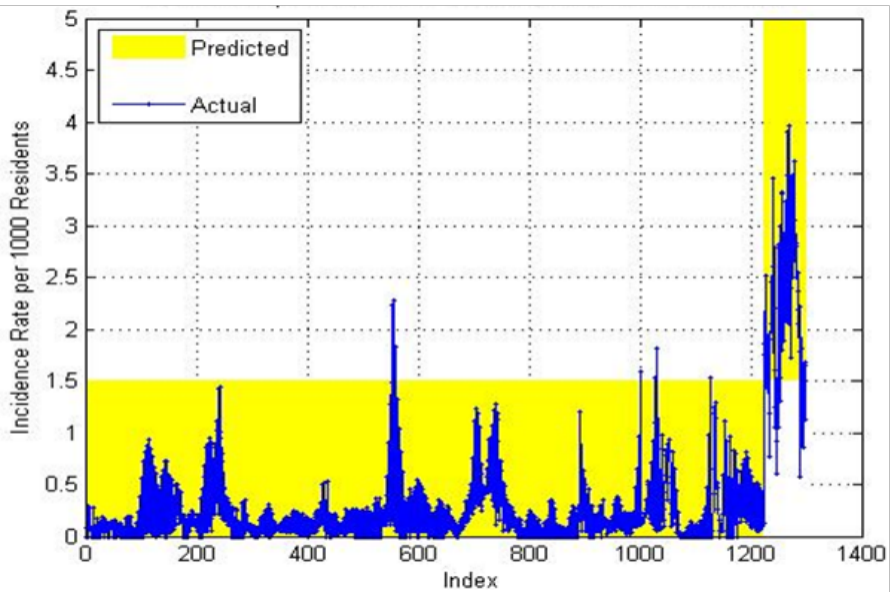

Supplement: MOESM17 [file 9525850]
